# Supplementary material for: Vision improvement in severe acute isolated optic neuritis after plasma exchange treatment in Chinese population: a prospective case series study
Source: PubMed Central journal article supplement — Ther Adv Neurol Disord. 2020 Aug 21;13:1756286420947977. doi: 10.1177/1756286420947977 (PMC7445352; doi:10.1177/1756286420947977), 2020-08-21
Supplement: TanS_PE_ON_paper_supp.pdf [file TanS_PE_ON_paper_supp.pdf]

**Supplementary table 1: The number and percentage of patients in different visual outcome categories along the plasma exchange treatments**

| <b>Visual outcome (VA)</b>              | <b>Onset</b>  | <b>Before PE</b>     | <b>1<sup>st</sup> PE</b> | <b>2<sup>nd</sup> PE</b> | <b>3<sup>rd</sup> PE</b> | <b>4<sup>th</sup> PE</b> | <b>5<sup>th</sup> PE</b> | <b>1-month</b>       |
|-----------------------------------------|---------------|----------------------|--------------------------|--------------------------|--------------------------|--------------------------|--------------------------|----------------------|
| <b>NLP</b>                              | 19<br>(51.4%) | 13<br>(35.1%)        | 6<br>(16.2%)             | 6<br>(16.2%)             | 6<br>(16.2%)             | 6<br>(16.2%)             | 6<br>(16.2%)             | 6<br>(16.2%)         |
| <b>LP</b>                               | 3<br>(8.1%)   | 0<br>(0.0%)          | 0<br>(0.0%)              | 0<br>(0.0%)              | 0<br>(0.0%)              | 0<br>(0.0%)              | 0<br>(0.0%)              | 0<br>(0.0%)          |
| <b>HM</b>                               | 4<br>(10.8%)  | 3<br>(8.1%)          | 2<br>(5.4%)              | 3<br>(8.1%)              | 2<br>(5.4%)              | 2<br>(5.4%)              | 1<br>(2.7%)              | 1<br>(2.7%)          |
| <b>CF</b>                               | 3<br>(8.1%)   | 8<br>(21.6%)         | 10<br>(27.0%)            | 9<br>(24.3%)             | 8<br>(21.6%)             | 7<br>(18.9%)             | 7<br>(18.9%)             | 7<br>(18.9%)         |
| <b>20/800 ≥ VA &gt; 20/2000</b>         | 1<br>(2.7%)   | 4<br>(10.8%)         | 5<br>(13.5%)             | 4<br>(10.8%)             | 5<br>(13.5%)             | 6<br>(16.2%)             | 6<br>(16.2%)             | 6<br>(16.2%)         |
| <b>20/200 ≥ VA &gt; 20/800</b>          | 7<br>(18.9%)  | 6<br>(16.2%)         | 7<br>(18.9%)             | 6<br>(16.2%)             | 7<br>(18.9%)             | 6<br>(16.2%)             | 7<br>(18.9%)             | 7<br>(18.9%)         |
| <b>20/60 ≥ VA &gt; 20/200</b>           | 0<br>(0.0%)   | 1<br>(2.7%)          | 4<br>(10.8%)             | 5<br>(13.5%)             | 3<br>(8.1%)              | 2<br>(5.4%)              | 0<br>(0.0%)              | 0<br>(0.0%)          |
| <b>20/30 ≥ VA &gt; 20/60</b>            | 0<br>(0.0%)   | 2<br>(5.4%)          | 2<br>(5.4%)              | 2<br>(5.4%)              | 4<br>(10.8%)             | 2<br>(5.4%)              | 3<br>(8.1%)              | 3<br>(8.1%)          |
| <b>Scotoma but VA better than 20/30</b> | 0<br>(0.0%)   | 0<br>(0.0%)          | 0<br>(0.0%)              | 1<br>(2.7%)              | 0<br>(0.0%)              | 3<br>(8.1%)              | 2<br>(5.4%)              | 2<br>(5.4%)          |
| <b>20/20</b>                            | 0<br>(0.0%)   | 0<br>(0.0%)          | 1<br>(2.7%)              | 1<br>(2.7%)              | 2<br>(5.4%)              | 3<br>(8.1%)              | 5<br>(13.5%)             | 5<br>(13.5%)         |
| <b>Adjusted <i>p</i></b>                | /             | > 0.999 <sup>a</sup> | 0.598 <sup>b</sup>       | 0.191 <sup>b</sup>       | 0.012 <sup>b</sup>       | 0.001 <sup>b</sup>       | < 0.001 <sup>b</sup>     | > 0.999 <sup>c</sup> |

CF: finger counting; HM: hand motion; LP: Light perception; NLP: No light perception; PE: Plasma exchange; VA: Visual acuity; <sup>a</sup> compared to the onset; <sup>b</sup> compared to before PE; <sup>c</sup> compared to the fifth PE.

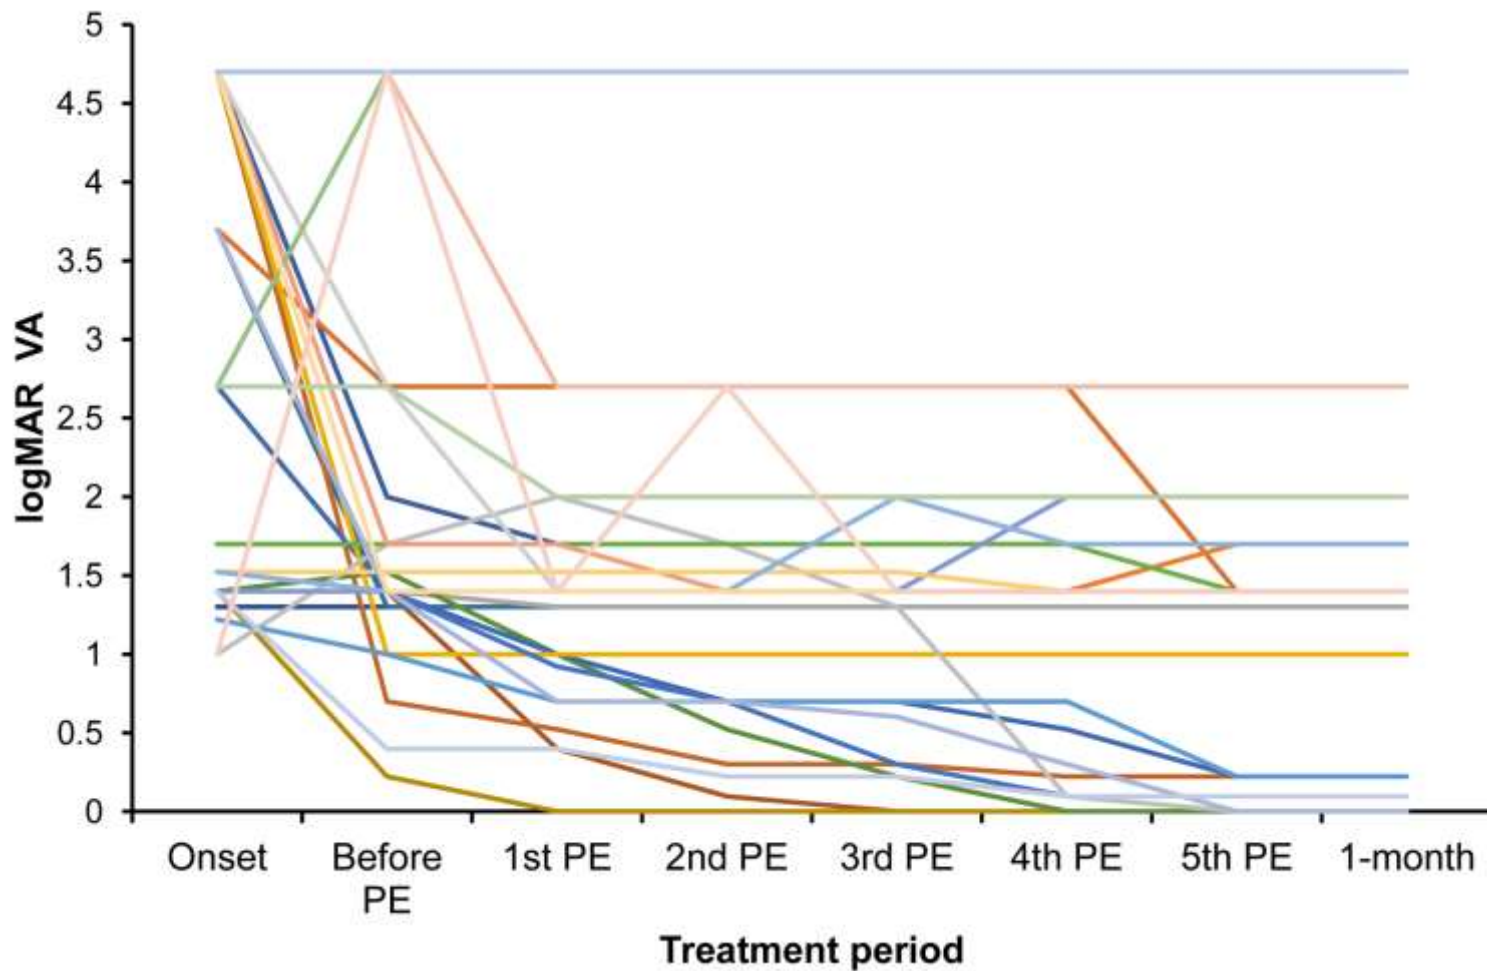

**Supplementary figure 1: Individual logMAR VA changes of the studied eyes along the plasma exchange treatment period.**

The logMAR VA of the 37 studied eyes at the onset, 1 day before PE therapy (after IVMP treatment), after each PE cycles and 1-month follow-up visit. PE: plasma exchange therapy; VA: visual acuity.

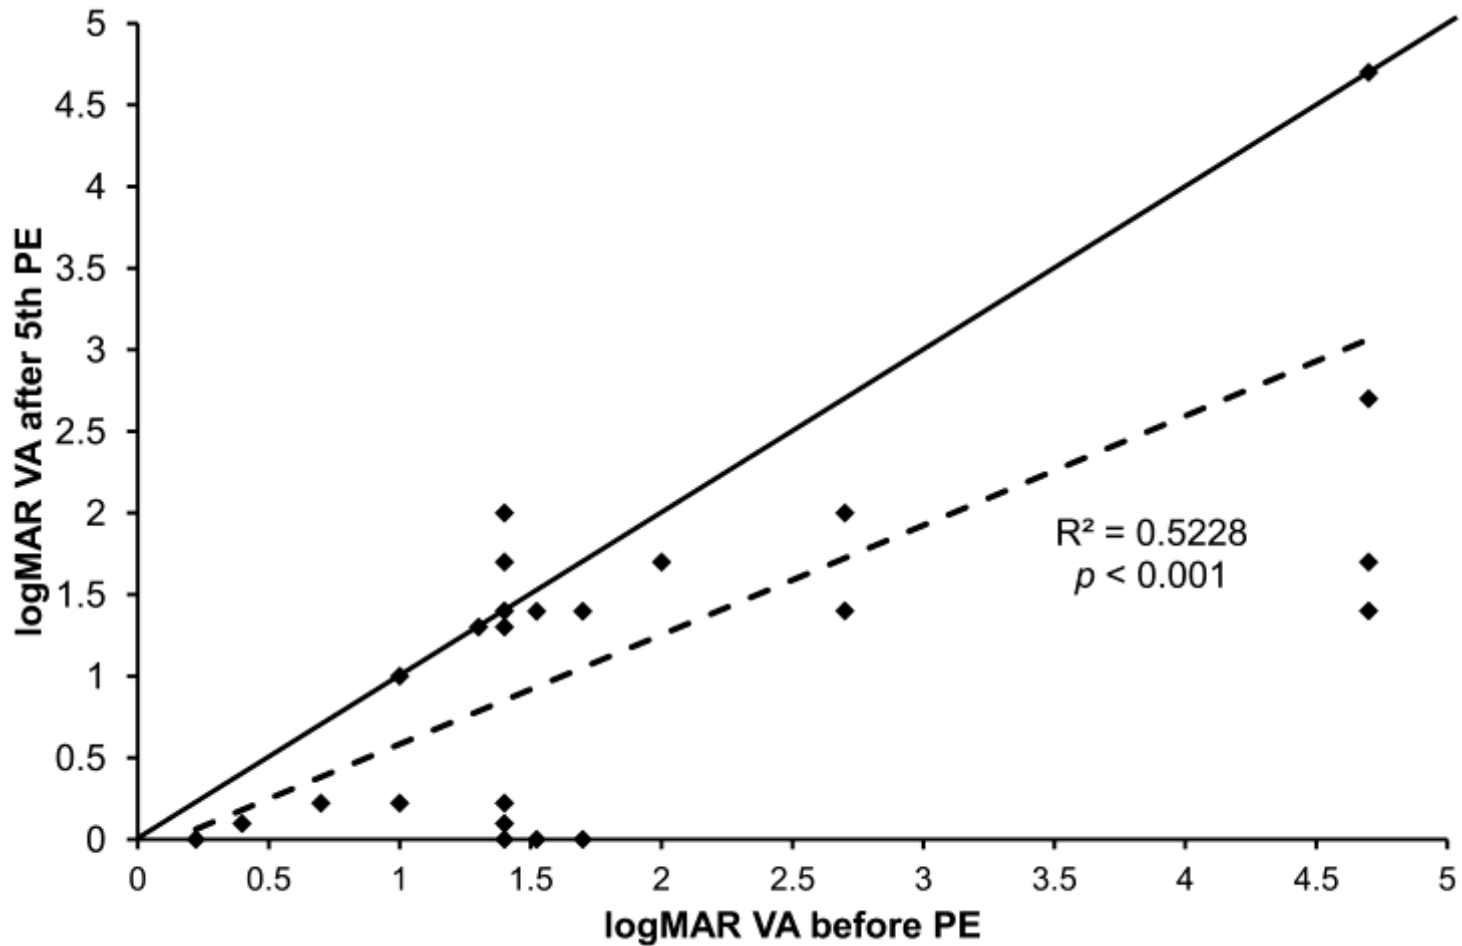

**Supplementary figure 2: The correlation of visual acuity of the studied eyes before and after the plasma exchange treatment.**

Majority of the VA after the fifth PE therapy was better than that before the PE treatment ( $R^2 = 0.523$ ;  $p < 0.001$ ). Only 3 eyes showed reduced VA and 7 eyes remained the same VA after the PE therapy. The data was presented as the logMAR VA. PE: plasma exchange therapy; VA: visual acuity. Solid line: the line representing the same VA before and after the PE treatment; Dotted line: the trend of the distribution of the data point in the graph.
